# Supplementary material for: Male Sex Is Associated with Higher Mortality and Increased Risk for Complications after Surgical Treatment of Proximal Humeral Fractures
Source: MDPI journal article supplement (doi:10.3390/jcm10112500), 2021-06-05
Supplement: s1 [file s1]

**Supplementary table S1:** Definition of all variables including diagnosis, procedure and pharmaceutical codes and endpoints. locked plate fixation – LPF, reverse total shoulder arthroplasty – RTSA.

| Variable                                                   | Classification | Code                                                                                        |
|------------------------------------------------------------|----------------|---------------------------------------------------------------------------------------------|
| Proximal humeral fracture                                  | ICD            | S42.2                                                                                       |
| LPF                                                        | OPS            | 5-794.21, 5-794.k1                                                                          |
| RTSA                                                       | OPS            | 5-824.21                                                                                    |
| <b>Comorbidities at baseline:</b>                          |                |                                                                                             |
| Alcohol abuses                                             | ICD            | F10, K70, G31.2, T51.0, T51.9, K29.2, K86.0, I42.6, K85.2, G62.1, G72.1, E24.4              |
| Atherosclerosis                                            | ICD            | I70                                                                                         |
| Atrial fibrillation and flutter                            | ICD            | I48                                                                                         |
| Bone tumor/metastasis                                      | ICD            | C40.0, C79.5, C79.86, C79.9                                                                 |
| Cancer                                                     | ICD            | C                                                                                           |
| Chronic kidney disease                                     | ICD            | N18, N19                                                                                    |
| Chronic polyarthritis                                      | ICD            | M05, M06                                                                                    |
| Congestive heart failure                                   | ICD            | I50                                                                                         |
| Coronary heart disease                                     | ICD            | I25                                                                                         |
| Dementia                                                   | ICD            | F00, F01, F02, F051 , G30, G31.1                                                            |
| Diabetes mellitus                                          | ICD            | E10-14                                                                                      |
| Hypertension                                               | ICD            | I10-I15                                                                                     |
| Infection                                                  | ICD            | T84.5, T84.6, T84.7, M86.01, M86.11, M86.21, M86.31, M86.41, M86.51, M86.61, M86.81, M86.91 |
| Nicotine abuses                                            | ICD            | F17                                                                                         |
| Obesity                                                    | ICD            | E66                                                                                         |
| Osteoporosis                                               | ICD            | M80-M85                                                                                     |
| Parkinson                                                  | ICD            | G20                                                                                         |
| Polytrauma                                                 | ICD, OPS, DRG  | ICD: T07, OPS: 5-982, or coded DRG started with “W”                                         |
| Previous stroke                                            | ICD            | I60-I69                                                                                     |
| <b>General complications:</b>                              |                |                                                                                             |
| Acute liver failure                                        | ICD            | K72.0, K72.7, K72.9                                                                         |
| Acute myocardial infarction                                | ICD            | I21, I22                                                                                    |
| Acute renal failure                                        | ICD            | N17                                                                                         |
| Acute respiratory distress syndrome                        | ICD            | J80                                                                                         |
| Cardiac arrest                                             | ICD            | I46                                                                                         |
| Deep vein thrombosis                                       | ICD            | I80.1, I80.2, I82.2, I82.3                                                                  |
| Pulmonary embolism                                         | ICD            | I26                                                                                         |
| Sepsis                                                     | ICD            | R65.0, R65.1, R65.9, R57.2 (since 2011), A41, A40, B37.7                                    |
| Stroke                                                     | ICD            | I60-I64                                                                                     |
| Ischemic stroke                                            | ICD            | I63-I64                                                                                     |
| Resuscitation                                              | OPS            | 8-77                                                                                        |
| Thrombo-embolic event                                      |                | Deep vein thrombosis, pulmonary embolism, ischemic stroke                                   |
| <b>Surgical complications:</b>                             |                |                                                                                             |
| Upper limb amputation, ipsilateral (shoulder or upper arm) | OPS            | 5-862.1, 5-862.2                                                                            |

|                                                                   |     |                                                                                                                                                                                                                                                                                                                                                                                                                                                                                                                                                                                                                                                                                                                                                                                                                                                                                                                                                                                                                                                                                                                                                                                      |
|-------------------------------------------------------------------|-----|--------------------------------------------------------------------------------------------------------------------------------------------------------------------------------------------------------------------------------------------------------------------------------------------------------------------------------------------------------------------------------------------------------------------------------------------------------------------------------------------------------------------------------------------------------------------------------------------------------------------------------------------------------------------------------------------------------------------------------------------------------------------------------------------------------------------------------------------------------------------------------------------------------------------------------------------------------------------------------------------------------------------------------------------------------------------------------------------------------------------------------------------------------------------------------------|
| Delayed union (LPF only; if coded within six months)              | OPS | 5-782.11, 5-782.21, 5-782.31, 5-782.41, 5-782.51, 5-782.61, 5-782.a1, 5-782.b1, 5-781.a1, 5-784.01, 5-784.11, 5-784.21, 5-784.31, 5-784.41, 5-784.71, 5-784.81, 5-784.b1                                                                                                                                                                                                                                                                                                                                                                                                                                                                                                                                                                                                                                                                                                                                                                                                                                                                                                                                                                                                             |
| Infection                                                         | OPS | 5-780.41, 5-780.51, 5-780.61, 5-780.71, 5-780.81, 5-780.91, 5-800.20, 5-800.30, 5-800.a0, 5-800.b0, 5-810.10, 5-810.70, 5-810.80, 8-989, 8-989.0, 8-989.1, 8-989.2, 8-989.3, 8-989.4, 8-989.5, 8-989.6                                                                                                                                                                                                                                                                                                                                                                                                                                                                                                                                                                                                                                                                                                                                                                                                                                                                                                                                                                               |
| Infection, resistant                                              | OPS | 8-987, 8-987.0, 8-987.00, 8-987.01, 8-987.02, 8-987.03, 8-987.1, 8-987.10, 8-987.11, 8-987.12, 8-987.13                                                                                                                                                                                                                                                                                                                                                                                                                                                                                                                                                                                                                                                                                                                                                                                                                                                                                                                                                                                                                                                                              |
| Joint damage / cartilage damage (LPF only)                        | OPS | 5-782.11, 5-782.21, 5-782.31, 5-782.41, 5-782.51, 5-782.61, 5-782.a1, 5-782.b1, 5-781.a1, 5-784.01, 5-784.11, 5-784.21, 5-784.31, 5-784.41, 5-784.71, 5-784.81, 5-784.b1                                                                                                                                                                                                                                                                                                                                                                                                                                                                                                                                                                                                                                                                                                                                                                                                                                                                                                                                                                                                             |
| Luxation                                                          | OPS | 8-201.0                                                                                                                                                                                                                                                                                                                                                                                                                                                                                                                                                                                                                                                                                                                                                                                                                                                                                                                                                                                                                                                                                                                                                                              |
| Malunion (LPF only)                                               | OPS | 5-781.01, 5-781.11, 5-781.21, 5-781.31, 5-781.41, 5-781.51, 5-781.61, 5-781.81, 5-781.91                                                                                                                                                                                                                                                                                                                                                                                                                                                                                                                                                                                                                                                                                                                                                                                                                                                                                                                                                                                                                                                                                             |
| Nerve injury                                                      | OPS | 5-040.1, 5-040.2, 5-040.3, 5-041.1, 5-041.2, 5-041.3, 5-044.1, 5-044.2, 5-044.3, 5-045.1, 5-045.2, 5-045.3, 5-046.1, 5-046.2, 5-046.3, 5-047.1, 5-047.2, 5-047.3, 5-048.1, 5-048.2, 5-048.3, 5-049.1, 5-049.2, 5-049.3, 5-04b.1, 5-04b.2, 5-04b.3, 5-050.1, 5-050.2, 5-050.3, 5-051.1, 5-051.2, 5-051.3, 5-052.1, 5-052.2, 5-052.3, 5-053.1, 5-053.2, 5-053.3, 5-054.1, 5-054.2, 5-054.3, 5-055.1, 5-055.2, 5-055.3, 5-056.1, 5-056.2, 5-056.3, 5-057.1, 5-057.2, 5-057.3                                                                                                                                                                                                                                                                                                                                                                                                                                                                                                                                                                                                                                                                                                            |
| Non-union / Pseudoarthrosis (LPF only; if coded after six months) | OPS | 5-782.11, 5-782.21, 5-782.31, 5-782.41, 5-782.51, 5-782.61, 5-782.a1, 5-782.b1, 5-781.a1, 5-784.01, 5-784.11, 5-784.21, 5-784.31, 5-784.41, 5-784.71, 5-784.81, 5-784.b1                                                                                                                                                                                                                                                                                                                                                                                                                                                                                                                                                                                                                                                                                                                                                                                                                                                                                                                                                                                                             |
| Osteonecrosis (LPF only)                                          | ICD | M87.21, M87.22, M87.32, M87.82, M87.92                                                                                                                                                                                                                                                                                                                                                                                                                                                                                                                                                                                                                                                                                                                                                                                                                                                                                                                                                                                                                                                                                                                                               |
| Postoperative stiffness, Adhesive capsulitis, Frozen shoulder     | OPS | 5-800.60, 5-810.20, 5-810.90, 5-800.c0                                                                                                                                                                                                                                                                                                                                                                                                                                                                                                                                                                                                                                                                                                                                                                                                                                                                                                                                                                                                                                                                                                                                               |
| Vascular injury                                                   | OPS | 5-388.11, 5-388.12, 5-395.11, 5-395.12, 5-397.11, 5-397.12                                                                                                                                                                                                                                                                                                                                                                                                                                                                                                                                                                                                                                                                                                                                                                                                                                                                                                                                                                                                                                                                                                                           |
| Secondary surgery, open (LPF)                                     | OPS | 5-780.01, 5-780.11, 5-780.21, 5-780.31, 5-780.61, 5-780.x1, 5-782.11, 5-782.21, 5-782.31, 5-782.41, 5-782.51, 5-782.62, 5-782.72, 5-782.82, 5-782.92, 5-782.a1, 5-784.01, 5-784.11, 5-784.21, 5-784.31, 5-784.41, 5-784.51, 5-784.61, 5-784.71, 5-784.81, 5-784.a1, 5-784.b1, 5-785.01, 5-785.11, 5-785.21, 5-785.31, 5-785.41, 5-785.51, 5-785.61, 5-785.71, 5-789.b1, 5-789.c1, 5-794.01, 5-794.11, 5-794.21, 5-794.41, 5-794.71, 5-794.81, 5-794.k1, 5-800.10, 5-800.30, 5-800.40, 5-800.50, 5-800.70, 5-800.80, 5-800.90, 5-800.x0, 5-801.00, 5-801.30, 5-801.40, 5-801.b0, 5-801.c0, 5-801.g0, 5-801.h0, 5-801.k0, 5-801.m0, 5-801.n0, 5-801.p0, 5-805.6, 5-805.7, 5-805.8, 5-805.9, 5-805.a, 5-850.01, 5-850.11, 5-850.21, 5-850.31, 5-850.41, 5-850.51, 5-850.61, 5-850.71, 5-850.81, 5-850.91, 5-850.a1, 5-850.b1, 5-850.c1, 5-850.d1, 5-850.e1, 5-850.f1, 5-850.g1, 5-850.h1, 5-850.j1, 5-850.x1, 5-851.11, 5-851.21, 5-852.01, 5-852.11, 5-853.01, 5-853.11, 5-855.01, 5-855.11, 5-855.21, 5-855.51, 5-855.61, 5-855.71, 5-855.81, 5-855.91, 5-855.a1, 5-859.01, 5-859.11, 5-862.1, 5-862.2, 5-892.06, 5-892.07, 5-892.16, 5-892.17, 5-896.06, 5-896.16, 5-896.26, 8-115.0 |
| Secondary surgery, open (RTSA)                                    | OPS | 5-780.01, 5-780.11, 5-780.21, 5-780.31, 5-780.61, 5-780.x1, 5-782.11, 5-782.21, 5-782.31, 5-782.41, 5-782.51, 5-782.62, 5-782.72, 5-782.82, 5-782.92, 5-782.a1, 5-785.01, 5-785.11, 5-785.21, 5-785.31, 5-785.41, 5-785.51, 5-785.61, 5-785.71, 5-789.b1, 5-791.02, 5-791.12, 5-791.22, 5-792.k2, 5-792.02, 5-792.12, 5-792.22, 5-792.k2, 5-800.10, 5-800.30, 5-800.40, 5-800.50, 5-800.70, 5-800.80, 5-800.90, 5-800.x0, 5-850.01, 5-850.11, 5-850.21, 5-850.31, 5-850.41, 5-850.51, 5-850.61, 5-850.71, 5-850.81, 5-850.91, 5-850.a1, 5-850.b1, 5-850.c1, 5-850.d1, 5-850.e1, 5-850.f1, 5-850.g1, 5-850.h1, 5-850.j1,                                                                                                                                                                                                                                                                                                                                                                                                                                                                                                                                                              |

|                                               |     |                                                                                                                                                                                                                                                                                                                                                                                                                                                                                                                                                                                                                                                                                                                                                                                                                                                                                                                                                                                                                                                                                                                                                                                                                                                                                                                                                                                                                                                                                                                                                                          |
|-----------------------------------------------|-----|--------------------------------------------------------------------------------------------------------------------------------------------------------------------------------------------------------------------------------------------------------------------------------------------------------------------------------------------------------------------------------------------------------------------------------------------------------------------------------------------------------------------------------------------------------------------------------------------------------------------------------------------------------------------------------------------------------------------------------------------------------------------------------------------------------------------------------------------------------------------------------------------------------------------------------------------------------------------------------------------------------------------------------------------------------------------------------------------------------------------------------------------------------------------------------------------------------------------------------------------------------------------------------------------------------------------------------------------------------------------------------------------------------------------------------------------------------------------------------------------------------------------------------------------------------------------------|
|                                               |     | 5-850.x1, 5-859.01, 5-859.11, 5-862.1, 5-862.2, 5-892.06, 5-892.07, 5-892.16, 5-892.17 5-896.06, 5-896.16, 5-896.26                                                                                                                                                                                                                                                                                                                                                                                                                                                                                                                                                                                                                                                                                                                                                                                                                                                                                                                                                                                                                                                                                                                                                                                                                                                                                                                                                                                                                                                      |
| Secondary arthroscopy (LPF)                   | OPS | 5-782.b1, 5-784.c1, 5-784.d1, 5-784.e1, 5-784.f1, 5-810.00, 5-810.10, 5-810.20, 5-810.40, 5-810.50, 5-810.70, 5-810.80, 5-810.90, 5-811.20, 5-811.30, 5-811.40 (since 2011), 5-812.00, 5-812.30, 5-812.90, 5-812.a0, 5-812.e0, 5-812.f0, 5-812.g0, 5-812.h0, 5-812.k0 (since 2011), 5-812.m0, 5-814.0, 5-814.1, 5-814.2, 5-814.3, 5-814.4, 5-812.40, 5-814.5, 5-814.6, 5-814.7 (since 2011), 5-814.8 (since 2011), 5-814.9 (since 2011), 5-814.b (since 2011), 5-814.c, 5-814.d, 5-814.e, 5-819.00, 5-819.20 (since 2011)                                                                                                                                                                                                                                                                                                                                                                                                                                                                                                                                                                                                                                                                                                                                                                                                                                                                                                                                                                                                                                                |
| Secondary arthroscopy (RTSA)                  | OPS | 5-782.b1, 5-810.00, 5-810.10, 5-810.20, 5-810.40, 5-810.50, 5-810.70, 5-810.80, 5-810.90, 5-811.20, 5-811.30, 5-811.40 (since 2011), 5-814.b (since 2011), 5-814.c, 5-814.d, 5-814.e, 5-819.00, 5-819.10 (since 2011), 5-819.20 (since 2011)                                                                                                                                                                                                                                                                                                                                                                                                                                                                                                                                                                                                                                                                                                                                                                                                                                                                                                                                                                                                                                                                                                                                                                                                                                                                                                                             |
| Revision (LPF)                                | OPS | 5-794.21, 5-794.k1, 5-824.21, 5-825.00 (since 2011), 5-825.10, 5-825.1 (2010-2012), 5-825.11, 5-825.1 (2010-2012), 5-825.12, 5-825.1 (2010-2012), 5-825.20, 5-825.21, 5-825.k, 5-825.k0, 5-825.k1, 5-825.kx, 5-825.1 (only 2010-2012), 5-78a.01, 5-78a.11, 5-78a.21, 5-78a.31, 5-78a.k1, 5-785.01, 5-785.11, 5-789.31, 5-794.11, 5-794.31, 5-794.41, 5-794.71, 5-794.81, 5-824.015-793.01, 5-793.11, 5-793.21, 5-793.31, 5-793.41, 5-793.51, 5-793.a1, 5-793.b1, 5-793.h1, 5-793.k1                                                                                                                                                                                                                                                                                                                                                                                                                                                                                                                                                                                                                                                                                                                                                                                                                                                                                                                                                                                                                                                                                      |
| Revision (RTSA)                               | OPS | 5-824.21, 5-825.00 (since 2011), 5-825.21, 5-825.8, 5-825.k, 5-825.k0, 5-825.k1, 5-825.kx, 5-825.1 (only 2010-2012), 5-787.01, 5-787.11, 5-787.21, 5-787.31, 5-787.k1, 5-810.40, 5-78a.01, 5-78a.11, 5-78a.21, 5-78a.k1, 5-785.01, 5-785.11, 5-789.31                                                                                                                                                                                                                                                                                                                                                                                                                                                                                                                                                                                                                                                                                                                                                                                                                                                                                                                                                                                                                                                                                                                                                                                                                                                                                                                    |
| Resection arthroplasty (for spacer placement) | OPS | 5-829.3                                                                                                                                                                                                                                                                                                                                                                                                                                                                                                                                                                                                                                                                                                                                                                                                                                                                                                                                                                                                                                                                                                                                                                                                                                                                                                                                                                                                                                                                                                                                                                  |
| Secondary arthroplasty (LPF only)             | OPS | 5-824.0, 5-824.20, 5-824.21                                                                                                                                                                                                                                                                                                                                                                                                                                                                                                                                                                                                                                                                                                                                                                                                                                                                                                                                                                                                                                                                                                                                                                                                                                                                                                                                                                                                                                                                                                                                              |
| Arthrolysis (LPF only)                        | OPS | 5-800.60, 5-810.20, 5-810.90                                                                                                                                                                                                                                                                                                                                                                                                                                                                                                                                                                                                                                                                                                                                                                                                                                                                                                                                                                                                                                                                                                                                                                                                                                                                                                                                                                                                                                                                                                                                             |
| Decompression of subacromial space (LPF only) | OPS | 5-814.3                                                                                                                                                                                                                                                                                                                                                                                                                                                                                                                                                                                                                                                                                                                                                                                                                                                                                                                                                                                                                                                                                                                                                                                                                                                                                                                                                                                                                                                                                                                                                                  |
| Debridement (LPF only)                        | OPS | 5-819.10 (since 2011)                                                                                                                                                                                                                                                                                                                                                                                                                                                                                                                                                                                                                                                                                                                                                                                                                                                                                                                                                                                                                                                                                                                                                                                                                                                                                                                                                                                                                                                                                                                                                    |
| Previous surgery (shoulder)                   | OPS | 5-040.1, 5-041.1, 5-044.1, 5-045.1, 5-046.1, 5-047.1, 5-048.1, 5-049.1, 5-04b.1, 5-050.1, 5-051.1, 5-052.1, 5-053.1, 5-054.1, 5-055.1, 5-056.1, 5-057.1, 5-388.11, 5-388.12, 5-395.11, 5-395.12, 5-397.11, 5-397.12, 5-780.01, 5-780.11, 5-780.21, 5-780.31, 5-780.41, 5-780.51, 5-780.61, 5-780.71, 5-780.81, 5-780.91, 5-780.x1, 5-781.01, 5-781.11, 5-781.21, 5-781.31, 5-781.41, 5-781.51, 5-781.61, 5-781.71, 5-781.81, 5-781.91, 5-781.a1, 5-781.x1, 5-782.11, 5-782.21, 5-782.31, 5-782.41, 5-782.51, 5-782.62, 5-782.72, 5-782.82, 5-782.92, 5-782.a1, 5-782.b1, 5-782.x1, 5-784.01, 5-784.11, 5-784.21, 5-784.31, 5-784.41, 5-784.51, 5-784.61, 5-784.71, 5-784.81, 5-784.92, 5-784.a1, 5-784.b1, 5-784.c1, 5-784.d1, 5-784.e1, 5-784.f1, 5-784.x1, 5-785.01, 5-785.11, 5-785.21, 5-785.31, 5-785.41, 5-785.51, 5-785.61, 5-785.71, 5-787.01, 5-787.11, 5-787.21, 5-787.31, 5-787.41, 5-787.51, 5-787.61, 5-787.71, 5-787.81, 5-787.91, 5-787.c1, 5-787.g1, 5-787.k1, 5-787.m1, 5-787.n1, 5-787.x1, 5-789.01, 5-789.31, 5-789.41, 5-789.b1, 5-789.c1, 5-789.x1, 5-78a.01, 5-78a.11, 5-78a.21, 5-78a.31, 5-78a.41, 5-78a.51, 5-78a.61, 5-78a.71, 5-78a.81, 5-78a.91, 5-78a.c1, 5-78a.g1, 5-78a.k1, 5-78a.m1, 5-78a.n1, 5-78a.x1, 5-791.02, 5-791.12, 5-791.22, 5-791.32, 5-791.42, 5-791.52, 5-791.62, 5-791.72, 5-791.82, 5-791.92, 5-791.c2, 5-791.d2, 5-791.g2, 5-791.h2, 5-791.k2, 5-791.m2, 5-791.n2, 5-791.x2, 5-792.02, 5-792.12, 5-792.22, 5-792.32, 5-792.42, 5-792.52, 5-792.62, 5-792.72, 5-792.82, 5-792.92, 5-792.g2, 5-792.h2, 5-792.k2, 5-792.m2, |

|                                                                        |     |                                                                                                                                                                                                                                                                                                                                                                                                                                                                                                                                                                                                                                                                                                                                                                                                                                                                                                                                                                                                                                                                                                                                                                                                                                                                                                                                                                                                                                                                                                                                                                                                                                                                                                                                                                                                                                                                                                                                                                                                                                                                                                                                                                                                                                                                                                                                                                                                                                                                                                                                                                                                                                                                                                                                                    |
|------------------------------------------------------------------------|-----|----------------------------------------------------------------------------------------------------------------------------------------------------------------------------------------------------------------------------------------------------------------------------------------------------------------------------------------------------------------------------------------------------------------------------------------------------------------------------------------------------------------------------------------------------------------------------------------------------------------------------------------------------------------------------------------------------------------------------------------------------------------------------------------------------------------------------------------------------------------------------------------------------------------------------------------------------------------------------------------------------------------------------------------------------------------------------------------------------------------------------------------------------------------------------------------------------------------------------------------------------------------------------------------------------------------------------------------------------------------------------------------------------------------------------------------------------------------------------------------------------------------------------------------------------------------------------------------------------------------------------------------------------------------------------------------------------------------------------------------------------------------------------------------------------------------------------------------------------------------------------------------------------------------------------------------------------------------------------------------------------------------------------------------------------------------------------------------------------------------------------------------------------------------------------------------------------------------------------------------------------------------------------------------------------------------------------------------------------------------------------------------------------------------------------------------------------------------------------------------------------------------------------------------------------------------------------------------------------------------------------------------------------------------------------------------------------------------------------------------------------|
|                                                                        |     | 5-792.n2, 5-792.x2, 5-793.01, 5-793.11, 5-793.21, 5-793.31, 5-793.41, 5-793.51, 5-793.61, 5-793.71, 5-793.81, 5-793.91, 5-793.a1, 5-793.b1, 5-793.c1, 5-793.g1, 5-793.h1, 5-793.k1, 5-793.m1, 5-793.n1, 5-793.x1, 5-794.01, 5-794.11, 5-794.21, 5-794.31, 5-794.41, 5-794.51, 5-794.61, 5-794.71, 5-794.81, 5-794.a1, 5-794.b1, 5-794.c1, 5-794.g1, 5-794.h1, 5-794.k1, 5-794.m1, 5-794.n1, 5-794.x1, 5-79a.00, 5-79a.10, 5-79a.60, 5-79a.70, 5-79a.80, 5-79a.e0, 5-79a.g0, 5-79a.x0, 5-79b.00, 5-79b.10, 5-79b.20, 5-79b.60, 5-79b.70, 5-79b.80, 5-79b.e0, 5-79b.g0, 5-79b.h0, 5-79b.x0, 5-800.00, 5-800.10, 5-800.20, 5-800.30, 5-800.40, 5-800.50, 5-800.60, 5-800.70, 5-800.80, 5-800.90, 5-800.a0, 5-800.b0, 5-800.c0, 5-800.x0, 5-801.00, 5-801.30, 5-801.40, 5-801.b0, 5-801.c0, 5-801.g0, 5-801.h0, 5-801.k0, 5-801.m0, 5-801.n0, 5-801.p0, 5-801.x0, 5-805.0, 5-805.1, 5-805.2, 5-805.3, 5-805.4, 5-805.5, 5-805.6, 5-805.7, 5-805.8, 5-805.9, 5-805.a, 5-805.b, 5-805.x, 5-805.y, 5-808.4, 5-809.00, 5-809.10, 5-809.20, 5-809.40, 5-809.x0, 5-810.00, 5-810.10, 5-810.20, 5-810.30, 5-810.40, 5-810.50, 5-810.60, 5-810.70, 5-810.80, 5-810.90, 5-810.x0, 5-811.20, 5-811.30, 5-811.40, 5-811.x0, 5-812.00, 5-812.30, 5-812.90, 5-812.a0, 5-812.e0, 5-812.f0, 5-812.g0, 5-812.h0, 5-812.k0, 5-812.m0, 5-812.x0, 5-814, 5-819.00, 5-819.10, 5-819.20, 5-819.x0, 5-824.0, 5-824.20, 5-824.21, 5-825.00, 5-825.1, 5-825.2, 5-825.20, 5-825.21, 5-825.2x, 5-825.7, 5-825.8, 5-825.h, 5-825.j, 5-825.k, 5-828.11, 5-828.41, 5-828.61, 5-829.j, 5-829.k, 5-850.01, 5-850.11, 5-850.21, 5-850.31, 5-850.41, 5-850.51, 5-850.61, 5-850.71, 5-850.81, 5-850.91, 5-850.a1, 5-850.b1, 5-850.c1, 5-850.d1, 5-850.e1, 5-850.f1, 5-850.g1, 5-850.h1, 5-850.j1, 5-850.x1, 5-851.01, 5-851.11, 5-851.21, 5-851.31, 5-851.41, 5-851.51, 5-851.61, 5-851.71, 5-851.81, 5-851.91, 5-851.a1, 5-851.b1, 5-851.c1, 5-851.d1, 5-851.x1, 5-852.01, 5-852.11, 5-852.21, 5-852.31, 5-852.41, 5-852.51, 5-852.61, 5-852.71, 5-852.81, 5-852.91, 5-852.a1, 5-852.b1, 5-852.c1, 5-852.d1, 5-852.h1, 5-852.j1, 5-852.x1, 5-853.01, 5-853.11, 5-853.21, 5-853.31, 5-853.41, 5-853.51, 5-853.61, 5-853.71, 5-853.81, 5-853.91, 5-853.x1, 5-854.01, 5-854.11, 5-854.21, 5-854.31, 5-854.41, 5-854.51, 5-854.61, 5-854.71, 5-854.81, 5-854.91, 5-854.a1, 5-854.x1, 5-855.01, 5-855.11, 5-855.21, 5-855.31, 5-855.41, 5-855.51, 5-855.61, 5-855.71, 5-855.81, 5-855.91, 5-855.a1, 5-855.b1, 5-855.x1, 5-856.01, 5-856.11, 5-856.21, 5-856.31, 5-856.41, 5-856.51, 5-856.61, 5-856.71, 5-856.81, 5-856.91, 5-856.a1, 5-856.x1, 5-859.01, 5-859.11, 5-859.21, 5-859.31, 5-859.x1, 5-862.0, 5-862.1, 5-862.2, 5-86a.3, 5-896.06, 5-896.16, 5-896.26, 5-896.x6, 5-983, 8-115.0 |
| <b>Pharmaceutical therapy:</b>                                         |     |                                                                                                                                                                                                                                                                                                                                                                                                                                                                                                                                                                                                                                                                                                                                                                                                                                                                                                                                                                                                                                                                                                                                                                                                                                                                                                                                                                                                                                                                                                                                                                                                                                                                                                                                                                                                                                                                                                                                                                                                                                                                                                                                                                                                                                                                                                                                                                                                                                                                                                                                                                                                                                                                                                                                                    |
| Any anticoagulant                                                      | ATC | B01AA, B01AB, B01AC, B01AE, B01AF, B01AX                                                                                                                                                                                                                                                                                                                                                                                                                                                                                                                                                                                                                                                                                                                                                                                                                                                                                                                                                                                                                                                                                                                                                                                                                                                                                                                                                                                                                                                                                                                                                                                                                                                                                                                                                                                                                                                                                                                                                                                                                                                                                                                                                                                                                                                                                                                                                                                                                                                                                                                                                                                                                                                                                                           |
| Vitamin D or calcium                                                   | ATC | A11CC                                                                                                                                                                                                                                                                                                                                                                                                                                                                                                                                                                                                                                                                                                                                                                                                                                                                                                                                                                                                                                                                                                                                                                                                                                                                                                                                                                                                                                                                                                                                                                                                                                                                                                                                                                                                                                                                                                                                                                                                                                                                                                                                                                                                                                                                                                                                                                                                                                                                                                                                                                                                                                                                                                                                              |
| Bisphosphonates                                                        | ATC | M05BA, M05BB                                                                                                                                                                                                                                                                                                                                                                                                                                                                                                                                                                                                                                                                                                                                                                                                                                                                                                                                                                                                                                                                                                                                                                                                                                                                                                                                                                                                                                                                                                                                                                                                                                                                                                                                                                                                                                                                                                                                                                                                                                                                                                                                                                                                                                                                                                                                                                                                                                                                                                                                                                                                                                                                                                                                       |
| Any osteoporosis pharmacotherapy                                       | ATC | Vitamin D/Calcium or Bisphosphonates                                                                                                                                                                                                                                                                                                                                                                                                                                                                                                                                                                                                                                                                                                                                                                                                                                                                                                                                                                                                                                                                                                                                                                                                                                                                                                                                                                                                                                                                                                                                                                                                                                                                                                                                                                                                                                                                                                                                                                                                                                                                                                                                                                                                                                                                                                                                                                                                                                                                                                                                                                                                                                                                                                               |
| <b>Classification of complications and long-term endpoints/events:</b> |     |                                                                                                                                                                                                                                                                                                                                                                                                                                                                                                                                                                                                                                                                                                                                                                                                                                                                                                                                                                                                                                                                                                                                                                                                                                                                                                                                                                                                                                                                                                                                                                                                                                                                                                                                                                                                                                                                                                                                                                                                                                                                                                                                                                                                                                                                                                                                                                                                                                                                                                                                                                                                                                                                                                                                                    |
| Major adverse event                                                    |     | resuscitation, cardiac arrest, myocardial infarction, stroke, acute renal failure, acute liver failure, acute respiratory distressed syndrome, sepsis or death from any case                                                                                                                                                                                                                                                                                                                                                                                                                                                                                                                                                                                                                                                                                                                                                                                                                                                                                                                                                                                                                                                                                                                                                                                                                                                                                                                                                                                                                                                                                                                                                                                                                                                                                                                                                                                                                                                                                                                                                                                                                                                                                                                                                                                                                                                                                                                                                                                                                                                                                                                                                                       |
| Surgical complications                                                 |     | Adhesive capsulitis, arthrolysis, debridement, decompression of subacromial space, frozen shoulder, infection, infection with antibiotic-resistant germs, joint damage/cartilage damage, luxation, delayed union, non-union/ pseudoarthrosis, malunion, nerve injury, vascular injury, osteonecrosis, postoperative stiffness, secondary                                                                                                                                                                                                                                                                                                                                                                                                                                                                                                                                                                                                                                                                                                                                                                                                                                                                                                                                                                                                                                                                                                                                                                                                                                                                                                                                                                                                                                                                                                                                                                                                                                                                                                                                                                                                                                                                                                                                                                                                                                                                                                                                                                                                                                                                                                                                                                                                           |

|                                               |     |                                                                                                                                                                                                                                                                                                                                                                                                                                                                                                                                                                                                                |
|-----------------------------------------------|-----|----------------------------------------------------------------------------------------------------------------------------------------------------------------------------------------------------------------------------------------------------------------------------------------------------------------------------------------------------------------------------------------------------------------------------------------------------------------------------------------------------------------------------------------------------------------------------------------------------------------|
|                                               |     | arthroplasty, secondary arthroscopy, secondary surgery (open) including revision surgery, upper limb amputation                                                                                                                                                                                                                                                                                                                                                                                                                                                                                                |
| Any secondary surgery (shoulder, ipsilateral) |     | All surgical intervention on the same side coded during follow-up, i.e. all secondary interventions coded with an OPS from this list beginning with "5-"                                                                                                                                                                                                                                                                                                                                                                                                                                                       |
| Minor outpatient complications                | ICD | G56.1, G56.2, G56.3, I80.80, I80.81, M00.01, M00.11, M00.21, M00.81, M00.91, M24.21, M24.41, M24.31, M24.51, M24.61, M25.11, M25.21, M25.31, M25.41, M25.51, M25.61, M25.71, M61.01, M62.21, M62.41, M62.51, M62.61, M65.81, M65.91, M75.0, M75.1, M75.2, M75.4, M75.5, M84.31, M86.01, M86.11, M86.21, M86.31, M86.41, M86.51, M86.61, M86.81, M86.91, M89.51, M96.6, S41.86, S43.0, S44, S45.0, S45.1, S46.0, S55.0, S55.1, T79.60, T81.4, T84.5, T84.6, T84.7, T84.00 (only RTSA), Only LPF: M13.11, M13.81, M13.91, M19.11, M24.01, M24.11, M62.22, M84.21, M87.21, M87.22, M87.32, M87.82, M87.92, M89.51 |

**Supplementary table 2:** Comorbidities, pharmacotherapy und complications during index case depending on sex.

|                                             | <b>All patients<br/>N= 53,971<br/>(100%)</b> | <b>Female sex<br/>N=45,707<br/>(84.7%)</b> | <b>Male sex<br/>N=8,264<br/>(15.4%)</b> | <b>p value</b> |
|---------------------------------------------|----------------------------------------------|--------------------------------------------|-----------------------------------------|----------------|
| Median age – years (IQR)                    | 79 (10)                                      | 79 (10)                                    | 76 (11)                                 | <.001          |
| Age ≥ 80 years – n (%)                      | 24,869<br>(46.1%)                            | 21,950<br>(48.0%)                          | 2,919 (35.3%)                           | <.001          |
| Reverse total shoulder arthroplasty – n (%) | 13,552<br>(25.1%)                            | 11,793<br>(25.8%)                          | 1,759 (21.3%)                           | <.001          |
| Osteoporosis – n (%)                        | 19,677<br>(36.5%)                            | 18,383<br>(40.2%)                          | 1,294 (15.7%)                           | <.001          |
| Cancer – n (%)                              | 11,877<br>(22.0%)                            | 9,502 (20.8%)                              | 2,375 (28.7%)                           | <.001          |
| Diabetes mellitus – n (%)                   | 21,640<br>(40.1%)                            | 18,178<br>(39.8%)                          | 3,462 (41.9%)                           | <.001          |
| Dementia – n (%)                            | 6,781 (12.6%)                                | 5,739 (12.6%)                              | 1,042 (12.6%)                           | 0.894          |
| Chronic polyarthritis – n (%)               | 3,305 (6.1%)                                 | 3,026 (6.6%)                               | 279 (3.4%)                              | <.001          |
| Obesity – n (%)                             | 15,360<br>(28.5%)                            | 13,261<br>(29.0%)                          | 2,099 (25.4%)                           | <.001          |
| Nicotin abuses – n (%)                      | 3,090 (5.7%)                                 | 1,983 (4.3%)                               | 1,107 (13.4%)                           | <.001          |
| Parkinson – n (%)                           | 2,152 (4.0%)                                 | 1,703 (3.7%)                               | 449 (5.4%)                              | <.001          |
| Previous surgery (shoulder) – n (%)         | 230 (0.4%)                                   | 186 (0.4%)                                 | 44 (0.5%)                               | 0.107          |
| Rotator cuff rupture – n (%)                | 3,931 (7.3%)                                 | 3,363 (7.4%)                               | 568 (6.9%)                              | 0.119          |
| Alcohol abuses – n (%)                      | 2,921 (5.4%)                                 | 1,415 (3.1%)                               | 1,506 (18.2%)                           | <.001          |
| Previous Stroke – n (%)                     | 13,575<br>(25.2%)                            | 11,180<br>(24.5%)                          | 2,395 (29.0%)                           | <.001          |
| Omarthrosis– n (%)                          | 1,250 (2.3%)                                 | 1,082 (2.4%)                               | 168 (2.0%)                              | 0.063          |
| Frozen shoulder – n (%)                     | 2,430 (4.5%)                                 | 2,140 (4.7%)                               | 290 (3.5%)                              | <.001          |
| Atrial fibrillation and flutter – n (%)     | 10,298<br>(19.1%)                            | 8,414 (18.4%)                              | 1,884 (22.8%)                           | <.001          |
| Congestive heart failure – n (%)            | 16,277<br>(30.2%)                            | 13,764<br>(30.1%)                          | 2,513 (30.4%)                           | 0.590          |
| Coronary heart disease – n (%)              | 16,588<br>(30.7%)                            | 13,551<br>(29.7%)                          | 3,037 (36.8%)                           | <.001          |
| Hypertension – n (%)                        | 47,475<br>(88.0%)                            | 40,479<br>(88.6%)                          | 6,996 (84.7%)                           | <.001          |
| Atherosclerosis – n (%)                     | 9,172 (17.0%)                                | 7,384 (16.2%)                              | 1,788 (21.6%)                           | <.001          |
| Chronic kidney disease – n (%)              | 15,152<br>(28.1%)                            | 12,612<br>(27.6%)                          | 2,540 (30.7%)                           | <.001          |
| Median Charlson comorbidity index – (IQR)   | 3 (3)                                        | 3 (3)                                      | 3 (4)                                   |                |
| Charlson comorbidity index – n (%)          |                                              |                                            |                                         | <.001          |
| 0                                           | 9,104 (16.9%)                                | 7,944 (17.4%)                              | 1,160 (14.0%)                           |                |
| 1                                           | 7,721 (14.3%)                                | 6,701 (14.7%)                              | 1,020 (12.3%)                           |                |
| 2                                           | 9,288 (17.2%)                                | 8,026 (17.6%)                              | 1,262 (15.3%)                           |                |
| 3                                           | 8,268 (15.3%)                                | 7,054 (15.4%)                              | 1,214 (14.7%)                           |                |
| 4                                           | 6,752 (12.5%)                                | 5,656 (12.4%)                              | 1,096 (13.3%)                           |                |
| 5                                           | 4,686 (8.7%)                                 | 3,857 (8.4%)                               | 829 (10.0%)                             |                |
| >5                                          | 8,152 (15.1%)                                | 6,469 (14.2%)                              | 1,683 (20.4%)                           |                |
| <b>Medication at admission – n (%):</b>     |                                              |                                            |                                         |                |
| Any anticoagulant                           | 15,375<br>(28.5%)                            | 12,550<br>(27.5%)                          | 2,825 (34.2%)                           | <.001          |

|                                                  |               |                |               |       |
|--------------------------------------------------|---------------|----------------|---------------|-------|
| Vitamin D or Calcium                             | 2,357 (4.4%)  | 2,109 (4.6%)   | 248 (3.0%)    | <.001 |
| Bisphosphonates                                  | 3,781 (7.0%)  | 3,621 (7.9%)   | 160 (1.9%)    | <.001 |
| Any osteoporosis pharmacotherapy                 | 5,543 (10.3%) | 51,162 (11.3%) | 381 (4.6%)    | <.001 |
| <b>Index case:</b>                               |               |                |               |       |
| Mean duration of hospitalization – days (+/- SD) | 15.8 (±12.0)  | 15.8 (±11.7)   | 16.3 (±13.3)  | <.001 |
| Major medical complications                      | 4,905 (9.1%)  | 3,866 (8.5%)   | 1,039 (12.6%) | <.001 |
| Surgical complications                           | 4,248 (7.9%)  | 3,340 (7.3%)   | 908 (11.0%)   | <.001 |

**Supplementary table S3:** Results of multivariable Cox regression models for different endpoints

presented in figure 3. confidence interval – CI, follow-up – FU, intra-hospital – IH, length of hospitalization – LOS, locked plate fixation – LPF, reverse total shoulder arthroplasty – RTSA.

| Variable                         | Hazard ratio | 95% CI      | P value |
|----------------------------------|--------------|-------------|---------|
| <b>Overall survival</b>          |              |             |         |
| Male vs female sex after LPF     | 1.67         | 1.60 – 1.75 | <.001   |
| Male vs female sex after RTSA    | 1.53         | 1.40 – 1.68 | <.001   |
| Age at index surgery             | 1.09         | 1.08 – 1.09 | <.001   |
| Diabetes mellitus                | 1.25         | 1.21 – 1.29 | <.001   |
| Dementia                         | 1.84         | 1.77 – 1.91 | <.001   |
| Chronic polyarthritis            | 1.09         | 1.02 – 1.16 | 0.009   |
| Obesity                          | 0.88         | 0.85 – 0.91 | <.001   |
| Nicotine abuses                  | 1.60         | 1.50 – 1.71 | <.001   |
| Parkinson                        | 1.31         | 1.23 – 1.40 | <.001   |
| Rotator cuff rupture             | 0.87         | 0.82 – 0.93 | <.001   |
| Alcohol abuses                   | 1.71         | 1.60 – 1.82 | <.001   |
| Previous stroke                  | 1.05         | 1.01 – 1.09 | 0.006   |
| Omarthrosis                      | 0.86         | 0.76 – 0.97 | 0.014   |
| Frozen shoulder                  | 0.81         | 0.75 – 0.88 | <.001   |
| Previous surgery (shoulder)      | 0.91         | 0.70 – 1.20 | 0.512   |
| Atrial fibrillation and flutter  | 1.31         | 1.26 – 1.37 | <.001   |
| Congestive heart failure         | 1.30         | 1.26 – 1.34 | <.001   |
| Coronary heart disease           | 1.00         | 0.96 – 1.03 | 0.776   |
| Hypertension                     | 0.98         | 0.92 – 1.03 | 0.388   |
| Atherosclerosis                  | 1.01         | 0.97 – 1.05 | 0.693   |
| Chronic kidney disease           | 1.24         | 1.20 – 1.28 | <.001   |
| Osteoporosis                     | 1.02         | 0.99 – 1.06 | 0.179   |
| Cancer                           | 1.14         | 1.10 – 1.18 | <.001   |
| Any anticoagulant                | 1.08         | 1.04 – 1.12 | <.001   |
| Any osteoporosis pharmacotherapy | 1.06         | 1.01 – 1.12 | 0.021   |
| Year of index surgery            | 0.99         | 0.98 – 1.00 | 0.006   |
| LOS index case                   | 1.01         | 1.01 – 1.01 | <.001   |
| Surgical compl. IH index case    | 1.11         | 1.05 – 1.17 | <.001   |
| General compl. IH index case     | 1.43         | 1.37 – 1.50 | <.001   |
| <b>Major adverse event</b>       |              |             |         |
| Male vs female sex after LPF     | 1.58         | 1.51 – 1.64 | <.001   |
| Male vs female sex after RTSA    | 1.44         | 1.33 – 1.56 | <.001   |
| Age at index surgery             | 1.06         | 1.06 – 1.07 | <.001   |

|                                        |      |             |       |
|----------------------------------------|------|-------------|-------|
| Diabetes mellitus                      | 1.28 | 1.24 – 1.31 | <.001 |
| Dementia                               | 1.60 | 1.55 – 1.66 | <.001 |
| Chronic polyarthritis                  | 1.11 | 1.05 – 1.17 | <.001 |
| Obesity                                | 0.95 | 0.92 – 0.98 | 0.001 |
| Nicotine abuses                        | 1.44 | 1.36 – 1.53 | <.001 |
| Parkinson                              | 1.29 | 1.22 – 1.37 | <.001 |
| Rotator cuff rupture                   | 0.93 | 0.88 – 0.98 | 0.008 |
| Alcohol abuses                         | 1.58 | 1.50 – 1.68 | <.001 |
| Previous stroke                        | 1.11 | 1.07 – 1.14 | <.001 |
| Omarthrosis                            | 0.87 | 0.78 – 0.96 | 0.006 |
| Frozen shoulder                        | 0.86 | 0.80 – 0.92 | <.001 |
| Previous surgery (shoulder)            | 1.03 | 0.83 – 1.27 | 0.819 |
| Atrial fibrillation and flutter        | 1.27 | 1.23 – 1.32 | <.001 |
| Congestive heart failure               | 1.25 | 1.21 – 1.29 | <.001 |
| Coronary heart disease                 | 1.04 | 1.01 – 1.07 | 0.015 |
| Hypertension                           | 1.04 | 0.99 – 1.09 | 0.170 |
| Atherosclerosis                        | 1.02 | 0.99 – 1.06 | 0.265 |
| Chronic kidney disease                 | 1.31 | 1.27 – 1.36 | <.001 |
| Osteoporosis                           | 1.01 | 0.98 – 1.04 | 0.468 |
| Cancer                                 | 1.09 | 1.05 – 1.12 | <.001 |
| Any anticoagulant                      | 1.08 | 1.04 – 1.11 | <.001 |
| Any osteoporosis pharmacotherapy       | 1.06 | 1.02 – 1.12 | 0.006 |
| Year of index surgery                  | 1.00 | 0.99 – 1.01 | 0.743 |
| LOS index case                         | 1.01 | 1.01 – 1.01 | <.001 |
| Surgical compl. IH index case          | 1.09 | 1.04 – 1.15 | <.001 |
| General compl. IH index case           | 1.45 | 1.39 – 1.52 | <.001 |
| <b>Thromboembolic event (or death)</b> |      |             |       |
| Male vs female sex after LPF           | 1.53 | 1.47 – 1.60 | <.001 |
| Male vs female sex after RTSA          | 1.42 | 1.31 – 1.55 | <.001 |
| Age at index surgery                   | 1.07 | 1.07 – 1.08 | <.001 |
| Diabetes mellitus                      | 1.24 | 1.20 – 1.27 | <.001 |
| Dementia                               | 1.70 | 1.63 – 1.76 | <.001 |
| Chronic polyarthritis                  | 1.11 | 1.05 – 1.18 | <.001 |
| Obesity                                | 0.92 | 0.89 – 0.95 | <.001 |
| Nicotine abuses                        | 1.51 | 1.42 – 1.60 | <.001 |
| Parkinson                              | 1.27 | 1.20 – 1.35 | <.001 |
| Rotator cuff rupture                   | 0.91 | 0.86 – 0.97 | 0.002 |
| Alcohol abuses                         | 1.57 | 1.47 – 1.67 | <.001 |
| Previous stroke                        | 1.10 | 1.07 – 1.14 | <.001 |
| Omarthrosis                            | 0.87 | 0.78 – 0.97 | 0.010 |
| Frozen shoulder                        | 0.82 | 0.76 – 0.88 | <.001 |
| Previous surgery (shoulder)            | 0.93 | 0.73 – 1.18 | 0.530 |
| Atrial fibrillation and flutter        | 1.25 | 1.21 – 1.30 | <.001 |
| Congestive heart failure               | 1.24 | 1.20 – 1.28 | <.001 |
| Coronary heart disease                 | 1.00 | 0.97 – 1.03 | 0.925 |
| Hypertension                           | 0.98 | 0.93 – 1.03 | 0.369 |
| Atherosclerosis                        | 1.01 | 0.97 – 1.05 | 0.602 |
| Chronic kidney disease                 | 1.23 | 1.19 – 1.27 | <.001 |
| Osteoporosis                           | 1.03 | 1.00 – 1.07 | 0.039 |
| Cancer                                 | 1.12 | 1.08 – 1.16 | <.001 |
| Any anticoagulant                      | 1.07 | 1.04 – 1.11 | <.001 |
| Any osteoporosis pharmacotherapy       | 1.07 | 1.02 – 1.12 | 0.011 |

|                                                                |      |             |       |
|----------------------------------------------------------------|------|-------------|-------|
| Year of index surgery                                          | 0.99 | 0.98 – 1.00 | 0.003 |
| LOS index case                                                 | 1.01 | 1.01 – 1.01 | <.001 |
| Surgical compl. IH index case                                  | 1.09 | 1.04 – 1.15 | <.001 |
| General compl. IH index case                                   | 1.40 | 1.34 – 1.46 | <.001 |
| <b>Surgical complications only during FU (after discharge)</b> |      |             |       |
| Male vs female sex after LPF                                   | 0.98 | 0.90 – 1.06 | 1.000 |
| Male vs female sex after RTSA                                  | 1.86 | 1.56 – 2.22 | <.001 |
| Age at index surgery                                           | 0.97 | 0.96 – 0.97 | <.001 |
| Diabetes mellitus                                              | 1.03 | 0.97 – 1.09 | 0.316 |
| Dementia                                                       | 0.76 | 0.68 – 0.84 | <.001 |
| Chronic polyarthritis                                          | 1.16 | 1.04 – 1.28 | 0.006 |
| Obesity                                                        | 1.17 | 1.10 – 1.26 | <.001 |
| Nicotine abuses                                                | 1.06 | 0.96 – 1.19 | 0.258 |
| Parkinson                                                      | 1.08 | 0.93 – 1.24 | 0.316 |
| Rotator cuff rupture                                           | 1.10 | 1.00 – 1.22 | 0.057 |
| Alcohol abuses                                                 | 1.26 | 1.13 – 1.41 | <.001 |
| Previous stroke                                                | 1.01 | 0.94 – 1.08 | 0.786 |
| Omarthrosis                                                    | 1.07 | 0.90 – 1.27 | 0.466 |
| Frozen shoulder                                                | 1.17 | 1.04 – 1.31 | 0.009 |
| Previous surgery (shoulder)                                    | 1.22 | 0.84 – 1.75 | 0.296 |
| Atrial fibrillation and flutter                                | 0.93 | 0.85 – 1.01 | 0.066 |
| Congestive heart failure                                       | 1.04 | 0.97 – 1.11 | 0.247 |
| Coronary heart disease                                         | 0.98 | 0.92 – 1.05 | 0.560 |
| Hypertension                                                   | 1.12 | 1.02 – 1.22 | 0.014 |
| Atherosclerosis                                                | 1.03 | 0.95 – 1.11 | 0.485 |
| Chronic kidney disease                                         | 1.07 | 1.00 – 1.14 | 0.059 |
| Osteoporosis                                                   | 1.12 | 1.05 – 1.19 | <.001 |
| Cancer                                                         | 0.96 | 0.89 – 1.02 | 0.172 |
| Any anticoagulant                                              | 1.05 | 0.98 – 1.12 | 0.198 |
| Any osteoporosis pharmacotherapy                               | 1.03 | 0.94 – 1.13 | 0.553 |
| Year of index surgery                                          | 0.99 | 0.98 – 1.00 | 0.138 |
| LOS index case                                                 | 1.00 | 0.99 – 1.00 | <.001 |
| Surgical compl. IH index case                                  | 1.63 | 1.50 – 1.78 | <.001 |
| General compl. IH index case                                   | 1.00 | 0.89 – 1.11 | 0.934 |
| <b>Surgical complications incl. index case</b>                 |      |             |       |
| Male vs female sex after LPF                                   | 1.14 | 1.07 – 1.22 | <.001 |
| Male vs female sex after RTSA                                  | 1.70 | 1.51 – 1.92 | <.001 |
| Age at index surgery                                           | 0.99 | 0.98 – 0.99 | <.001 |
| Diabetes mellitus                                              | 1.01 | 0.97 – 1.06 | 0.575 |
| Dementia                                                       | 0.91 | 0.85 – 0.98 | 0.009 |
| Chronic polyarthritis                                          | 1.04 | 0.96 – 1.13 | 0.354 |
| Obesity                                                        | 1.11 | 1.06 – 1.16 | <.001 |
| Nicotine abuses                                                | 1.05 | 0.96 – 1.14 | 0.297 |
| Parkinson                                                      | 1.08 | 0.97 – 1.19 | 0.154 |
| Rotator cuff rupture                                           | 1.19 | 1.10 – 1.28 | <.001 |
| Alcohol abuses                                                 | 1.33 | 1.22 – 1.44 | <.001 |
| Previous stroke                                                | 0.96 | 0.91 – 1.01 | 0.119 |
| Omarthrosis                                                    | 1.04 | 0.91 – 1.18 | 0.604 |
| Frozen shoulder                                                | 1.11 | 1.01 – 1.22 | 0.030 |
| Previous surgery (shoulder)                                    | 1.70 | 1.33 – 2.16 | <.001 |
| Atrial fibrillation and flutter                                | 1.00 | 0.94 – 1.06 | 0.980 |
| Congestive heart failure                                       | 1.04 | 0.99 – 1.10 | 0.114 |
| Coronary heart disease                                         | 0.96 | 0.91 – 1.01 | 0.085 |

|                                                      |      |             |       |
|------------------------------------------------------|------|-------------|-------|
| Hypertension                                         | 1.11 | 1.04 – 1.19 | 0.003 |
| Atherosclerosis                                      | 1.00 | 0.95 – 1.06 | 0.975 |
| Chronic kidney disease                               | 1.09 | 1.04 – 1.15 | <.001 |
| Osteoporosis                                         | 1.13 | 1.08 – 1.19 | <.001 |
| Cancer                                               | 0.98 | 0.93 – 1.03 | 0.327 |
| Any anticoagulant                                    | 1.02 | 0.97 – 1.07 | 0.485 |
| Any osteoporosis pharmacotherapy                     | 1.03 | 0.96 – 1.11 | 0.359 |
| Year of index surgery                                | 0.99 | 0.98 – 0.99 | <.001 |
| LOS index case                                       | 1.01 | 1.01 – 1.02 | <.001 |
| General compl. IH index case                         | 1.25 | 1.15 – 1.34 | <.001 |
| <b>Any secondary surgery (shoulder, ipsilateral)</b> |      |             |       |
| Male vs female sex after LPF                         | 0.99 | 0.91 – 1.08 | 1.000 |
| Male vs female sex after RTSA                        | 1.76 | 1.46 – 2.12 | <.001 |
| Age at index surgery                                 | 0.96 | 0.96 – 0.97 | <.001 |
| Diabetes mellitus                                    | 1.03 | 0.97 – 1.09 | 0.368 |
| Dementia                                             | 0.71 | 0.64 – 0.80 | <.001 |
| Chronic polyarthritis                                | 1.15 | 1.03 – 1.28 | 0.015 |
| Obesity                                              | 1.15 | 1.08 – 1.23 | <.001 |
| Nicotine abuses                                      | 1.05 | 0.93 – 1.17 | 0.442 |
| Parkinson                                            | 1.08 | 0.93 – 1.25 | 0.320 |
| Rotator cuff rupture                                 | 1.10 | 1.00 – 1.22 | 0.063 |
| Alcohol abuses                                       | 1.22 | 1.09 – 1.37 | <.001 |
| Previous stroke                                      | 1.00 | 0.93 – 1.07 | 0.984 |
| Omarthrosis                                          | 1.06 | 0.89 – 1.26 | 0.531 |
| Frozen shoulder                                      | 1.15 | 1.02 – 1.30 | 0.020 |
| Previous surgery (shoulder)                          | 1.32 | 0.92 – 1.90 | 0.136 |
| Atrial fibrillation and flutter                      | 0.92 | 0.84 – 1.00 | 0.049 |
| Congestive heart failure                             | 1.04 | 0.97 – 1.12 | 0.282 |
| Coronary heart disease                               | 0.98 | 0.92 – 1.05 | 0.537 |
| Hypertension                                         | 1.11 | 1.01 – 1.21 | 0.027 |
| Atherosclerosis                                      | 1.05 | 0.97 – 1.13 | 0.236 |
| Chronic kidney disease                               | 1.05 | 0.98 – 1.13 | 0.152 |
| Osteoporosis                                         | 1.12 | 1.05 – 1.20 | <.001 |
| Cancer                                               | 0.97 | 0.91 – 1.04 | 0.398 |
| Any anticoagulant                                    | 1.07 | 1.00 – 1.15 | 0.064 |
| Any osteoporosis pharmacotherapy                     | 1.02 | 0.92 – 1.12 | 0.720 |
| Year of index surgery                                | 1.00 | 0.98 – 1.01 | 0.384 |
| LOS index case                                       | 0.99 | 0.99 – 1.00 | <.001 |
| Surgical compl. IH index case                        | 1.61 | 1.46 – 1.76 | <.001 |
| General compl. IH index case                         | 0.98 | 0.87 – 1.10 | 0.708 |
| <b>Minor outpatient complications</b>                |      |             |       |
| Male vs female sex after LPF                         | 0.91 | 0.86 – 0.96 | 0.004 |
| Male vs female sex after RTSA                        | 1.02 | 0.92 – 1.12 | 1.000 |
| Age at index surgery                                 | 0.97 | 0.96 – 0.97 | <.001 |
| Diabetes mellitus                                    | 0.95 | 0.92 – 0.98 | 0.003 |
| Dementia                                             | 0.66 | 0.62 – 0.70 | <.001 |
| Chronic polyarthritis                                | 1.12 | 1.05 – 1.19 | <.001 |
| Obesity                                              | 1.18 | 1.14 – 1.22 | <.001 |
| Nicotine abuses                                      | 0.95 | 0.89 – 1.02 | 0.173 |
| Parkinson                                            | 1.01 | 0.92 – 1.10 | 0.862 |
| Rotator cuff rupture                                 | 2.19 | 2.08 – 2.31 | <.001 |
| Alcohol abuses                                       | 0.88 | 0.81 – 0.95 | <.001 |

|                                  |      |             |       |
|----------------------------------|------|-------------|-------|
| Previous stroke                  | 0.99 | 0.95 – 1.03 | 0.644 |
| Omarthrosis                      | 1.48 | 1.35 – 1.63 | <.001 |
| Frozen shoulder                  | 2.66 | 2.51 – 2.83 | <.001 |
| Previous surgery (shoulder)      | 1.00 | 0.81 – 1.22 | 0.965 |
| Atrial fibrillation and flutter  | 0.88 | 0.84 – 0.93 | <.001 |
| Congestive heart failure         | 1.04 | 0.99 – 1.08 | 0.096 |
| Coronary heart disease           | 1.06 | 0.99 – 1.08 | 0.096 |
| Hypertension                     | 1.13 | 1.07 – 1.19 | <.001 |
| Atherosclerosis                  | 1.14 | 1.09 – 1.19 | <.001 |
| Chronic kidney disease           | 0.95 | 0.92 – 0.99 | 0.022 |
| Osteoporosis                     | 1.15 | 1.11 – 1.19 | <.001 |
| Cancer                           | 1.06 | 1.02 – 1.10 | 0.006 |
| Any anticoagulant                | 1.01 | 0.97 – 1.05 | 0.680 |
| Any osteoporosis pharmacotherapy | 1.09 | 1.03 – 1.15 | 0.002 |
| Year of index surgery            | 1.01 | 1.01 – 1.02 | <.001 |
| LOS index case                   | 1.00 | 0.99 – 1.00 | <.001 |
| Surgical compl. IH index case    | 1.30 | 1.23 – 1.38 | <.001 |
| General compl. IH index case     | 0.90 | 0.84 – 0.96 | 0.001 |
